# Supplementary material for: The gut microbiome of 7-37 month old children from The Gambia shows the development of a distinct non-industrial Prevotella-based trophic network
Source: Research Square preprint supplement (doi:10.21203/rs.3.rs-220931/v1), 2021-03-02

Supplementary Figure 5. Multivariate linear regression analysis for alpha diversity indexes with age, WAZ, HAZ, and WHZ

5.a Multivariate linear regression model  
Fisher's Alpha ~ age + WAZ + HAZ + WHZ

|     | Coefficient | P         | Signi |
|-----|-------------|-----------|-------|
| age | 0.27165521  | 2.26e-120 | **    |
| WAZ | 0.04246510  | 7.89e-01  |       |
| HAZ | 0.03151150  | 7.83e-01  |       |
| WHZ | 0.09633963  | 4.50e-01  |       |

age R=0.59 p=3.1e-135

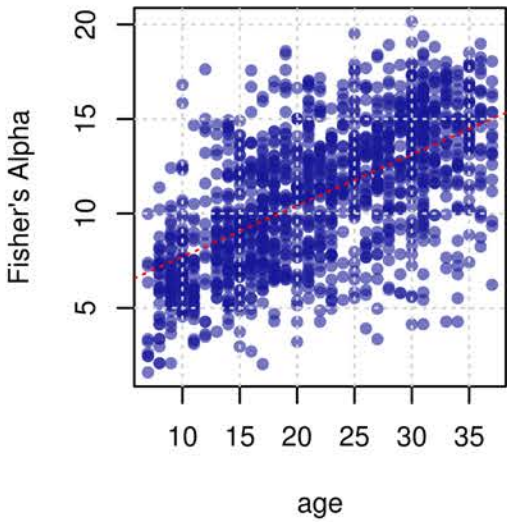

age R=0.55 p=4e-107

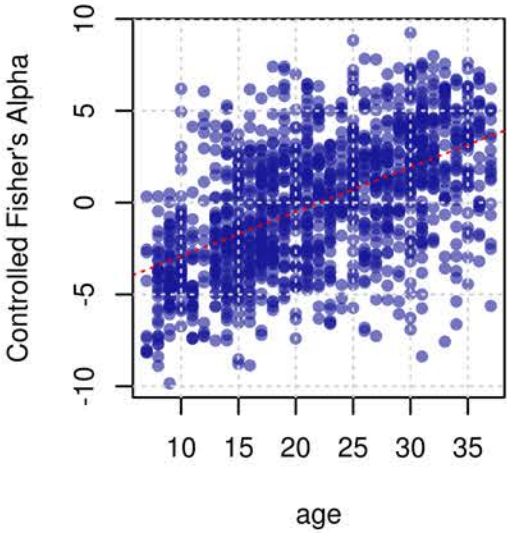

WAZ R=-0.089 p=0.00094

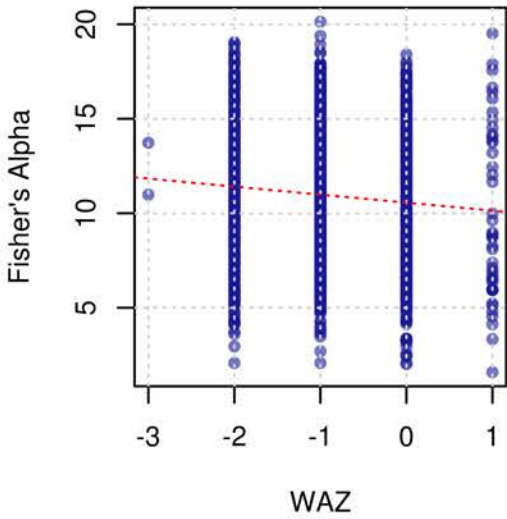

WAZ R=0.0022 p=0.94

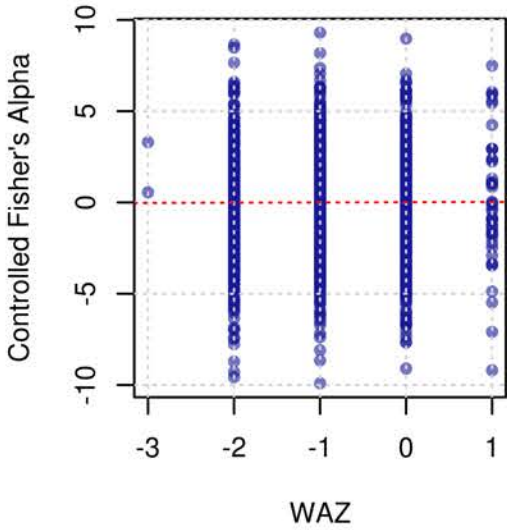

HAZ R=-0.15 p=3.5e-08

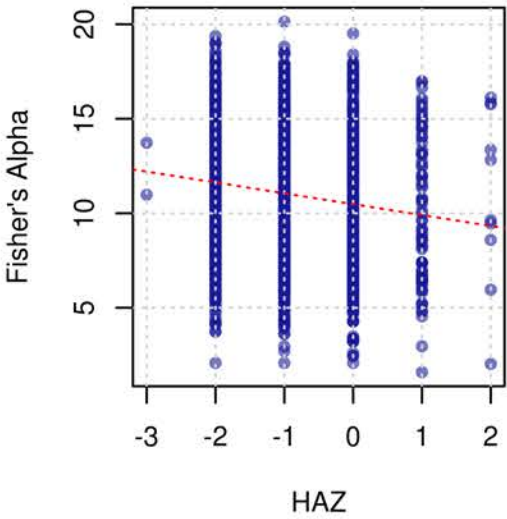

HAZ R=-0.014 p=0.61

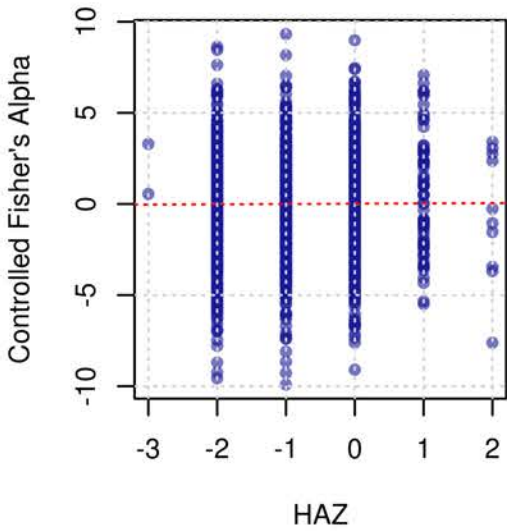

WHZ R=0.065 p=0.016

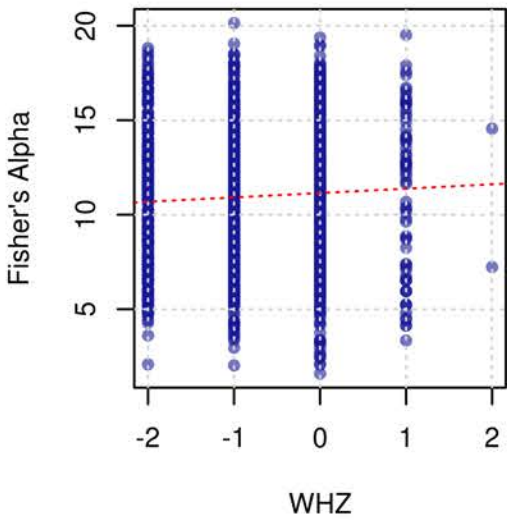

WHZ R=0.02 p=0.45

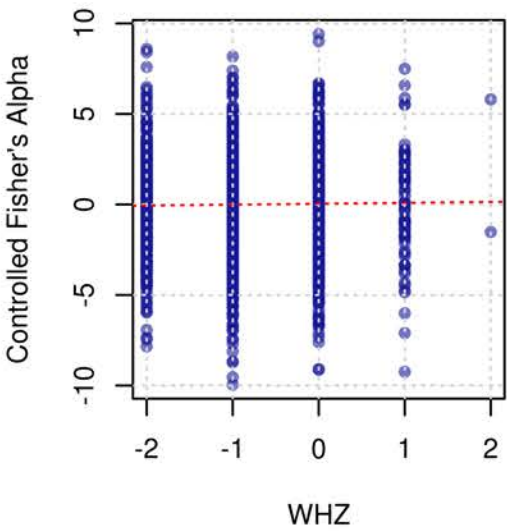

Supplementary Figure 5. Continued

5.b Multivariate linear regression model  
Simpson's ~ age + WAZ + HAZ + WHZ

|     | Coefficient  | P     | Signi |
|-----|--------------|-------|-------|
| age | 0.0003491916 | 0.312 |       |
| WAZ | 0.0012718561 | 0.808 |       |
| HAZ | 0.0029149711 | 0.439 |       |
| WHZ | 0.0002541838 | 0.952 |       |

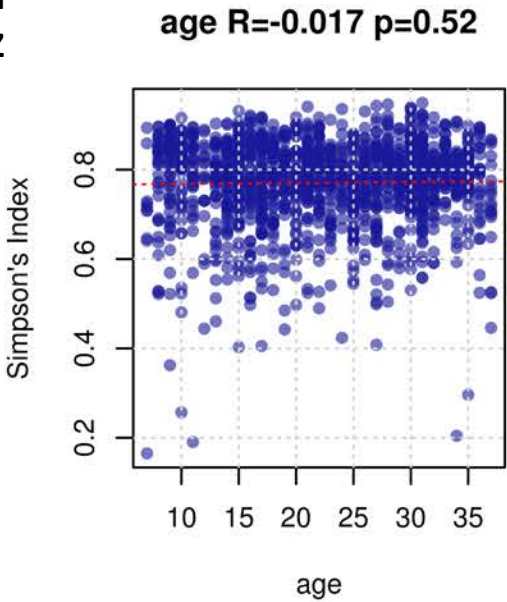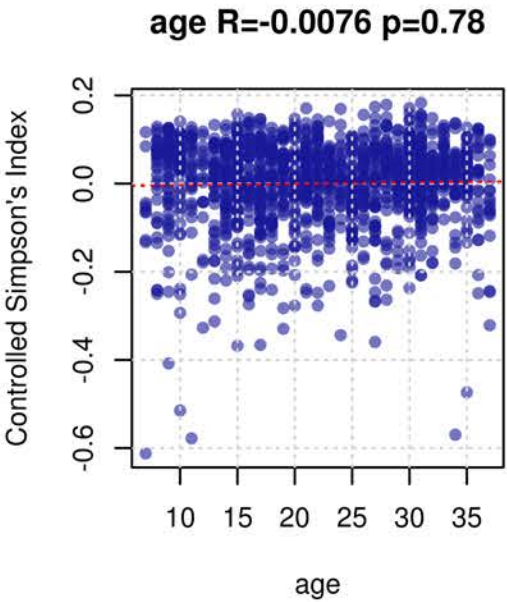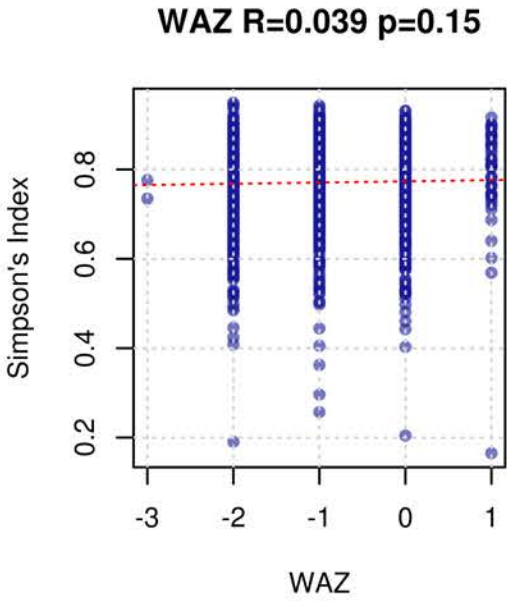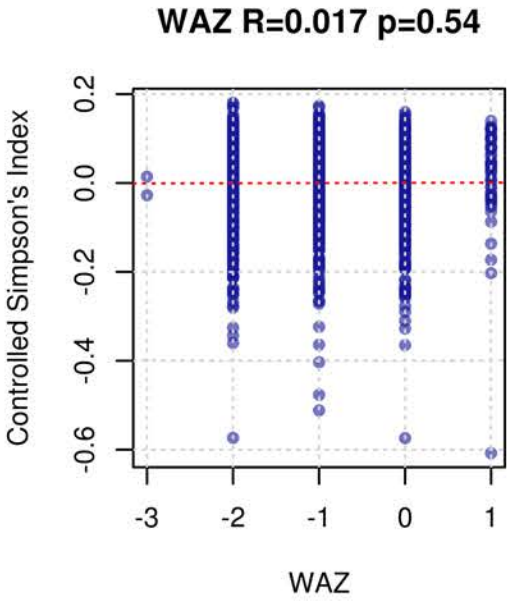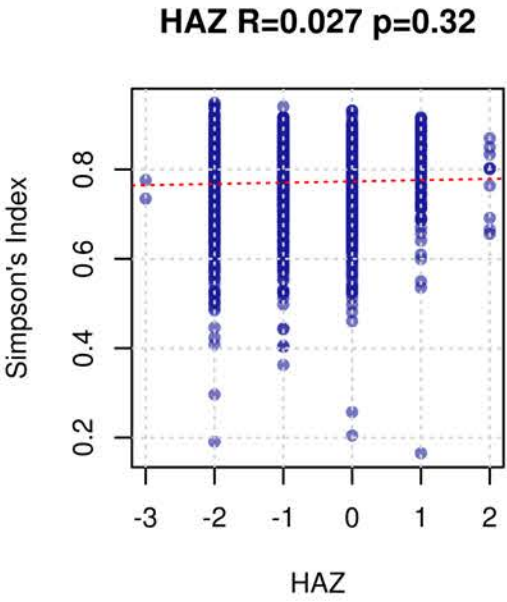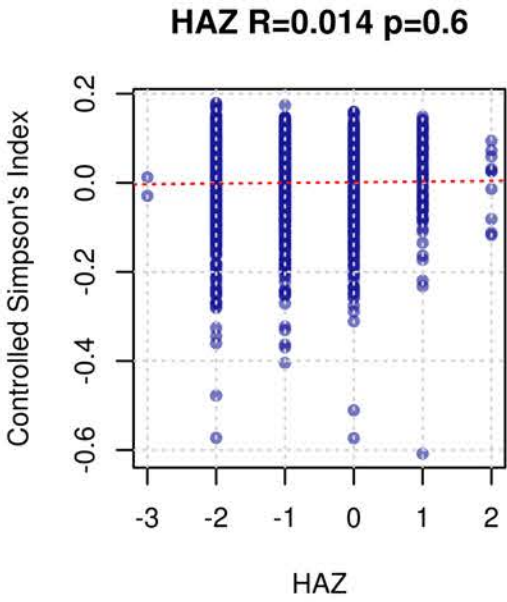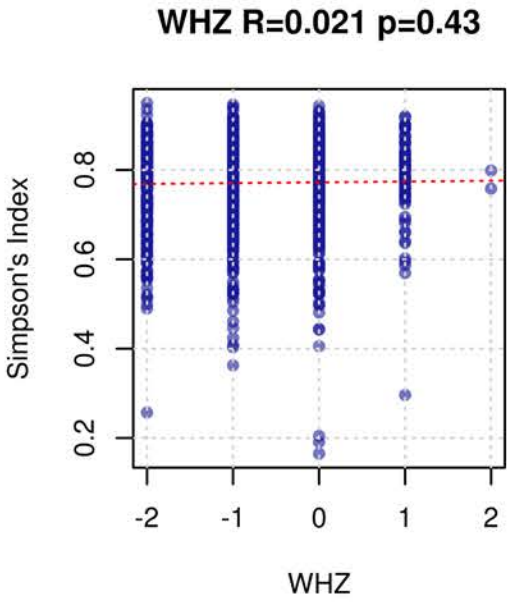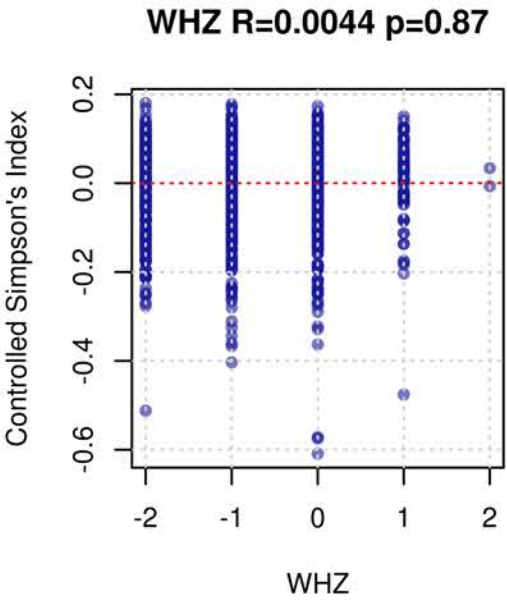



Supplementary Figure 5. Continued

5.c Multivariate linear regression model  
Richness ~ age + WAZ + HAZ + WHZ

|     | Coefficient | P        | Sign |
|-----|-------------|----------|------|
| age | 0.77973357  | 1.65e-82 | **   |
| WAZ | -0.02865546 | 9.60e-01 |      |
| HAZ | 0.36471565  | 3.77e-01 |      |
| WHZ | 0.22595115  | 6.22e-01 |      |

age R=0.51 p=6.8e-94

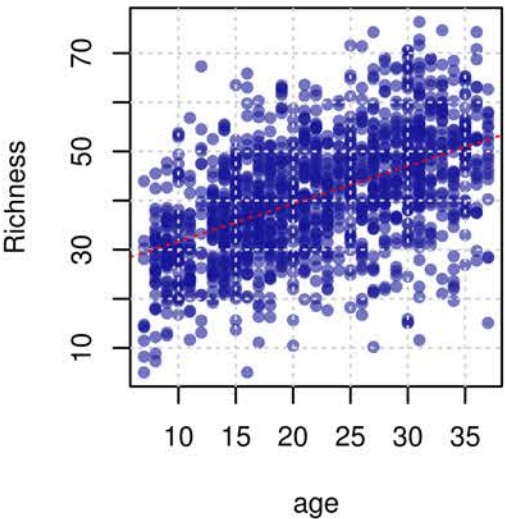

age R=0.47 p=2e-75

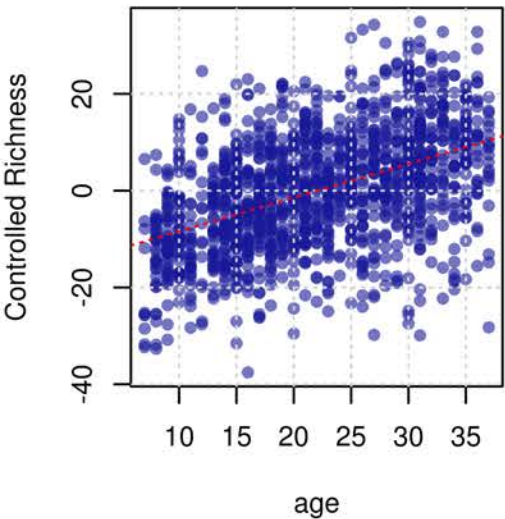

WAZ R=-0.075 p=0.0053

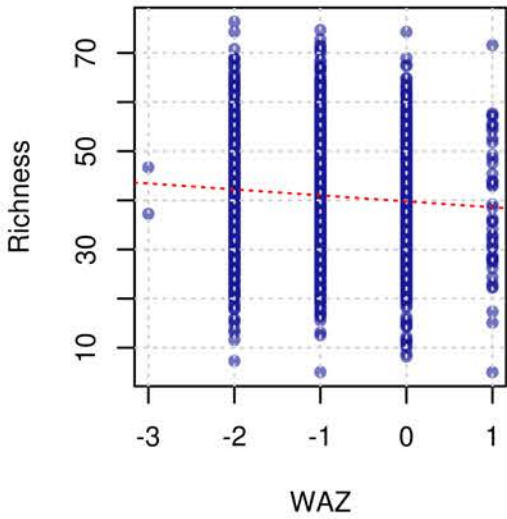

WAZ R=0.00074 p=0.98

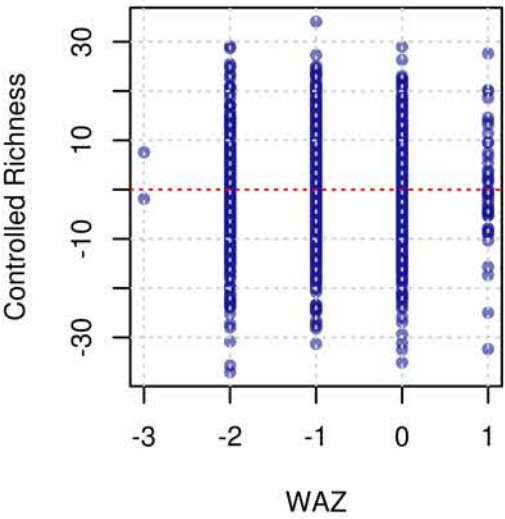

HAZ R=-0.11 p=3e-05

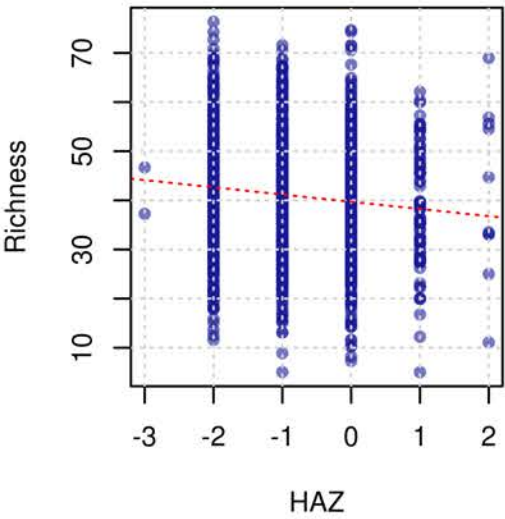

HAZ R=0.0084 p=0.76

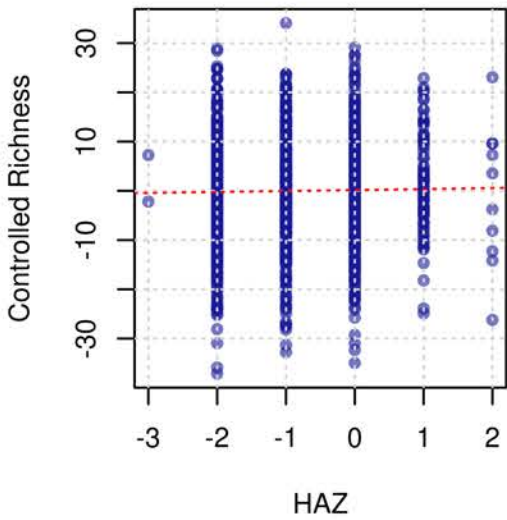

WHZ R=0.052 p=0.052

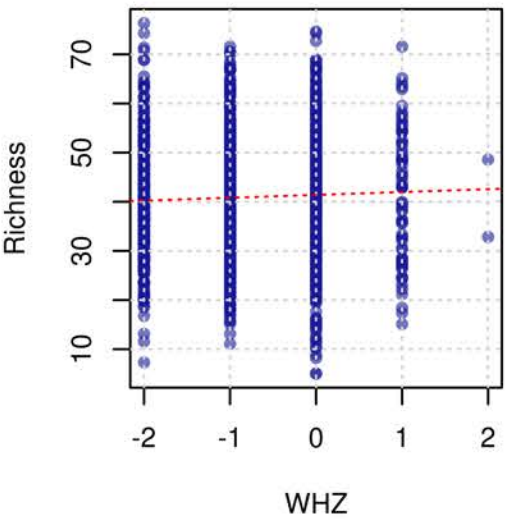

WHZ R=0.016 p=0.56

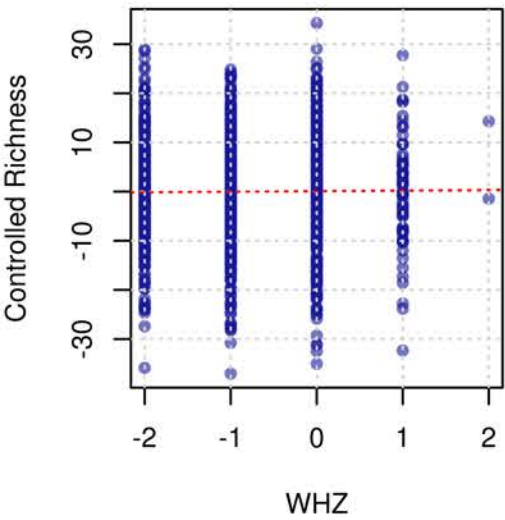

Supplementary Figure 5. Continued

5.d Multivariate linear regression model  
Chao1 ~ age + WAZ + HAZ + WHZ

|     | Coefficient | P         | Signi |
|-----|-------------|-----------|-------|
| age | 1.8260444   | 1.88e-104 | **    |
| WAZ | 0.3934922   | 7.36e-01  |       |
| HAZ | 0.7256428   | 3.88e-01  |       |
| WHZ | 0.5024521   | 5.90e-01  |       |

age R=0.56 p=8.2e-118

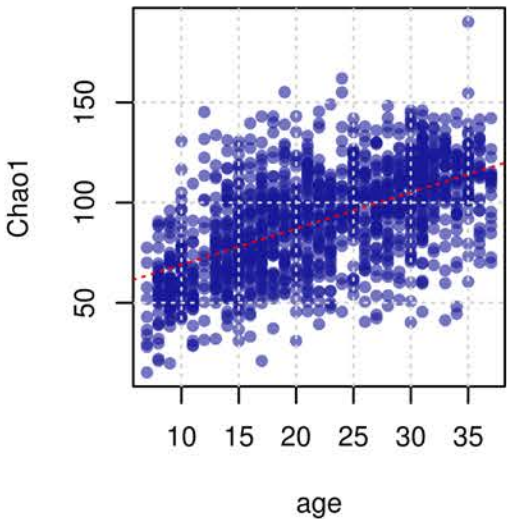

age R=0.52 p=1.1e-94

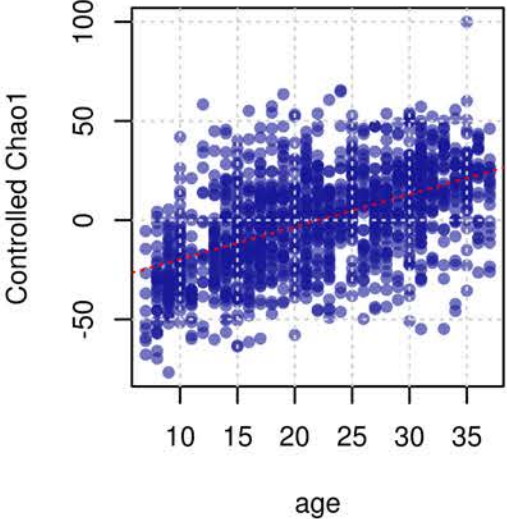

WAZ R=-0.07 p=0.0098

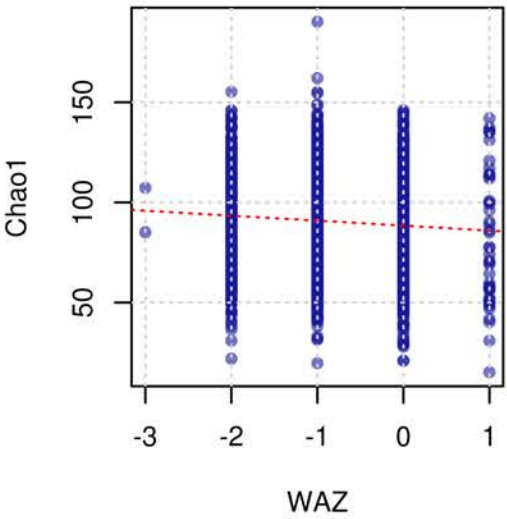

WAZ R=0.011 p=0.67

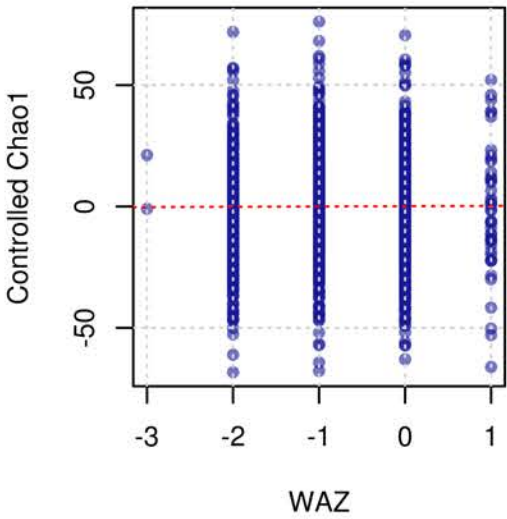

HAZ R=-0.12 p=1.2e-05

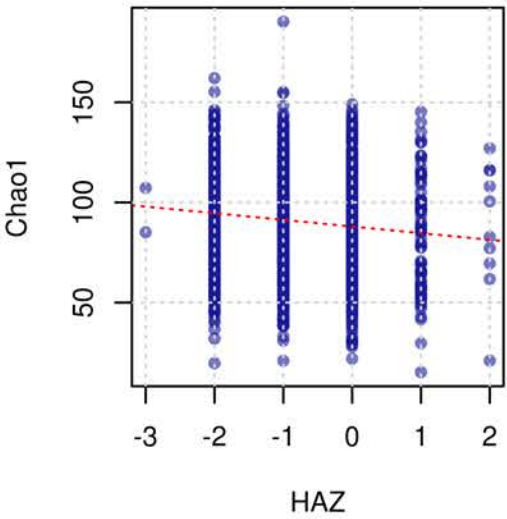

HAZ R=0.0097 p=0.72

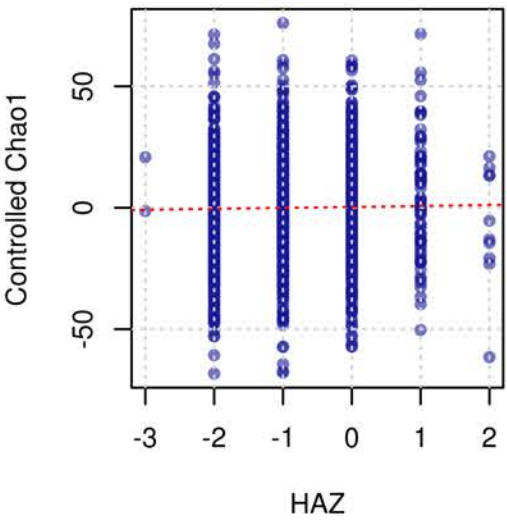

WHZ R=0.066 p=0.014

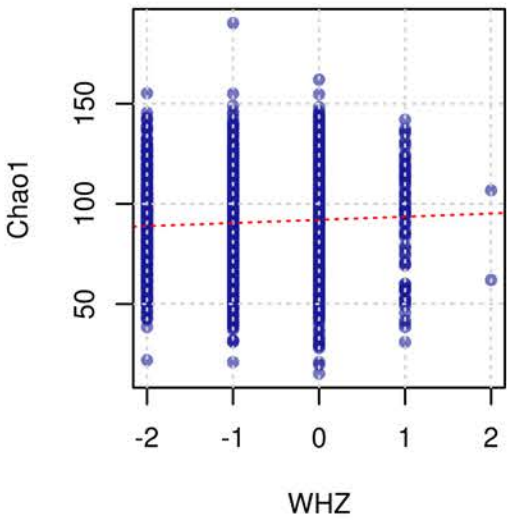

WHZ R=0.02 p=0.47

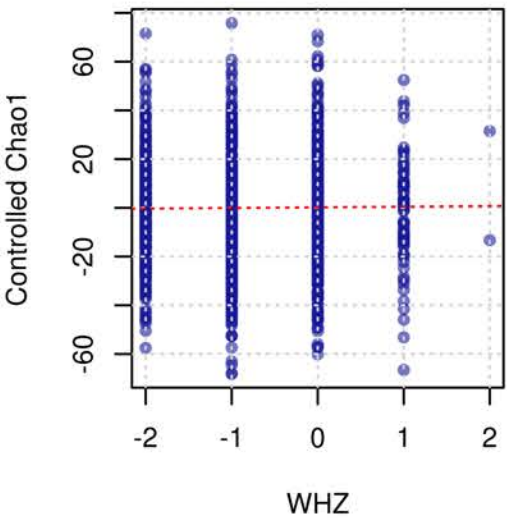

Supplement: Supplementary file 2 [file 21a551ac17b3918034b684f8.pdf]
