# Supplementary material for: The gut microbiome of 7-37 month old children from The Gambia shows the development of a distinct non-industrial Prevotella-based trophic network
Source: Research Square preprint supplement (doi:10.21203/rs.3.rs-220931/v1), 2021-03-02

Supplementary Figure 3. Eight species were significantly different between the D1 and D85 timepoints

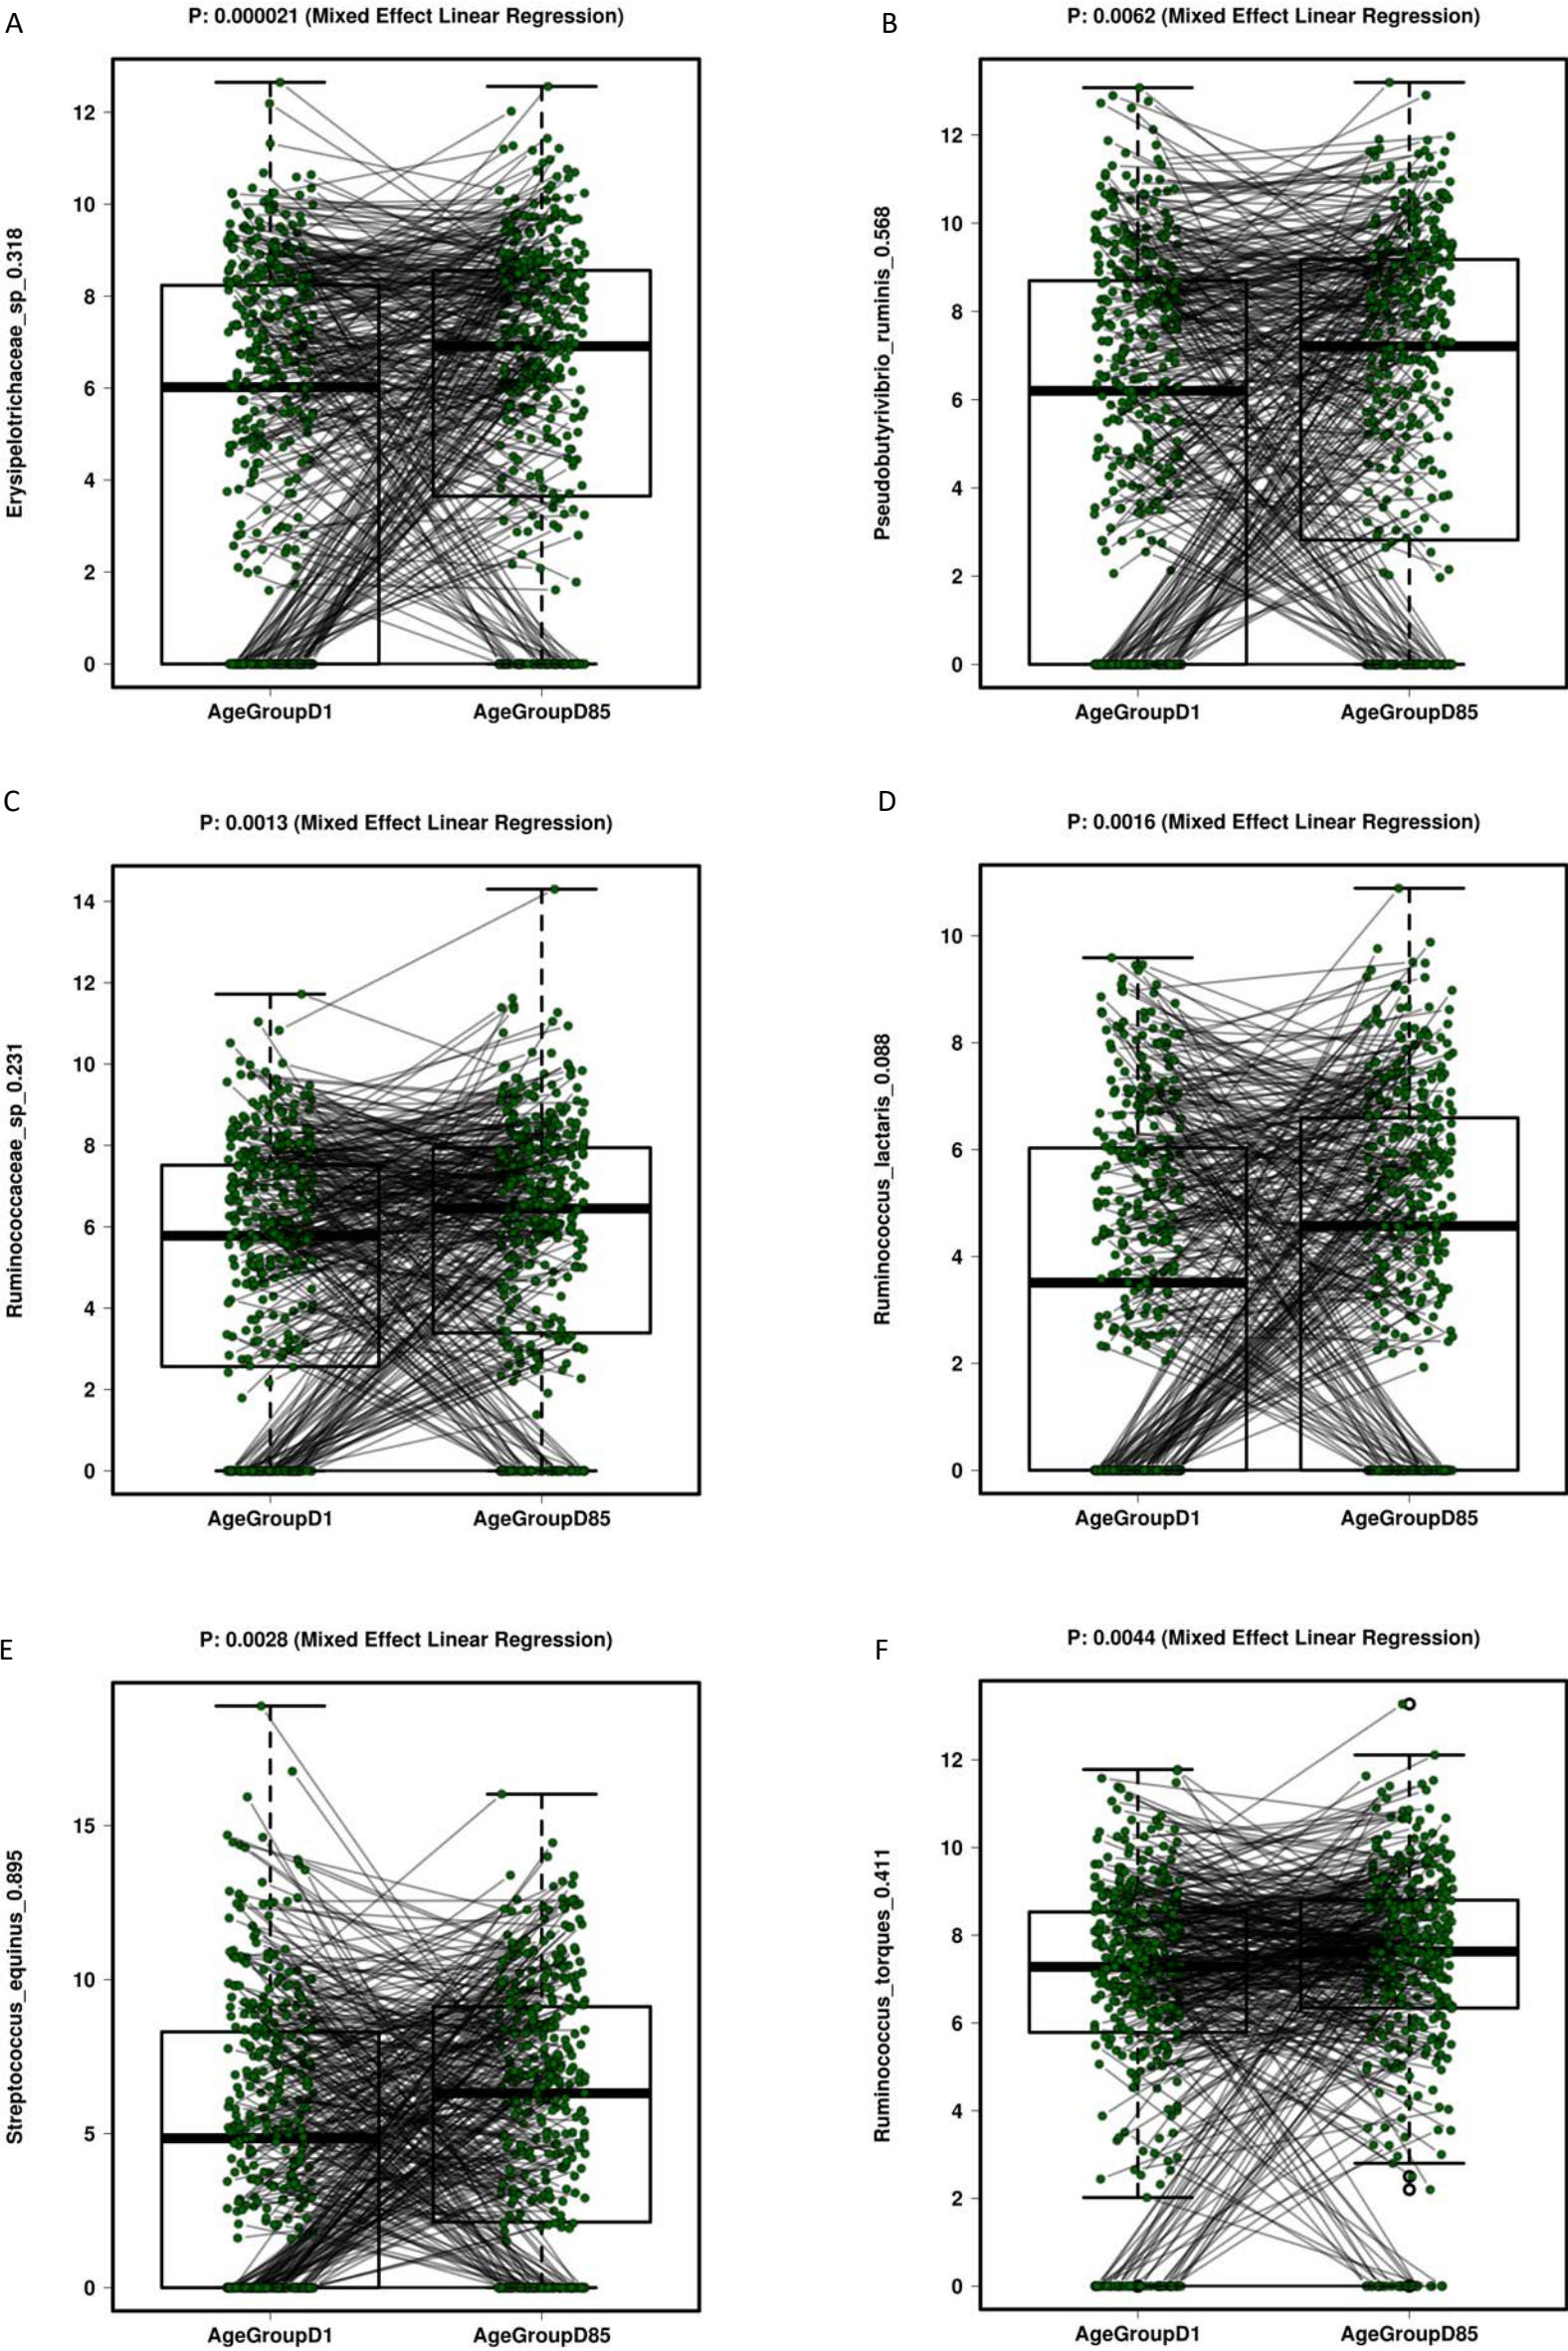



Supplementary Figure XX timepoints: Continued

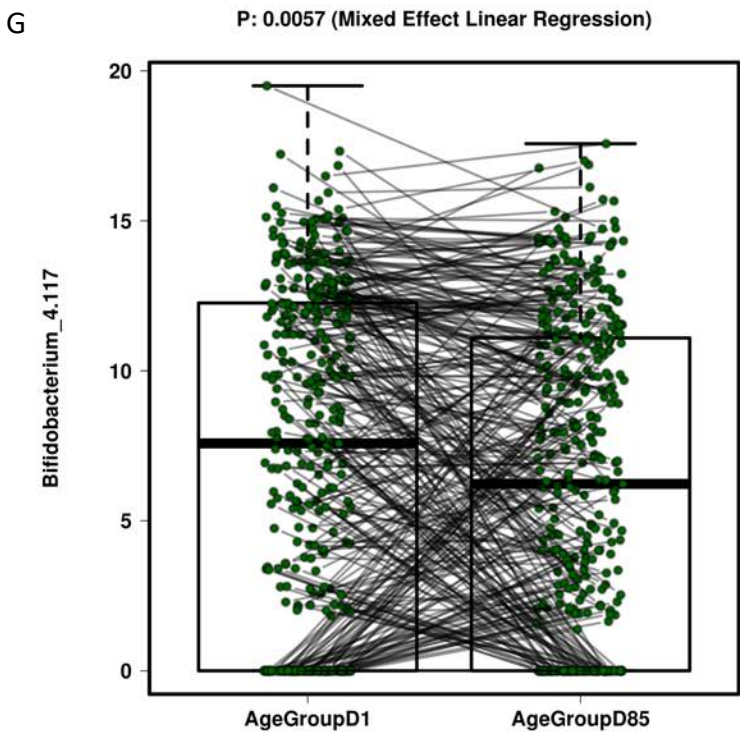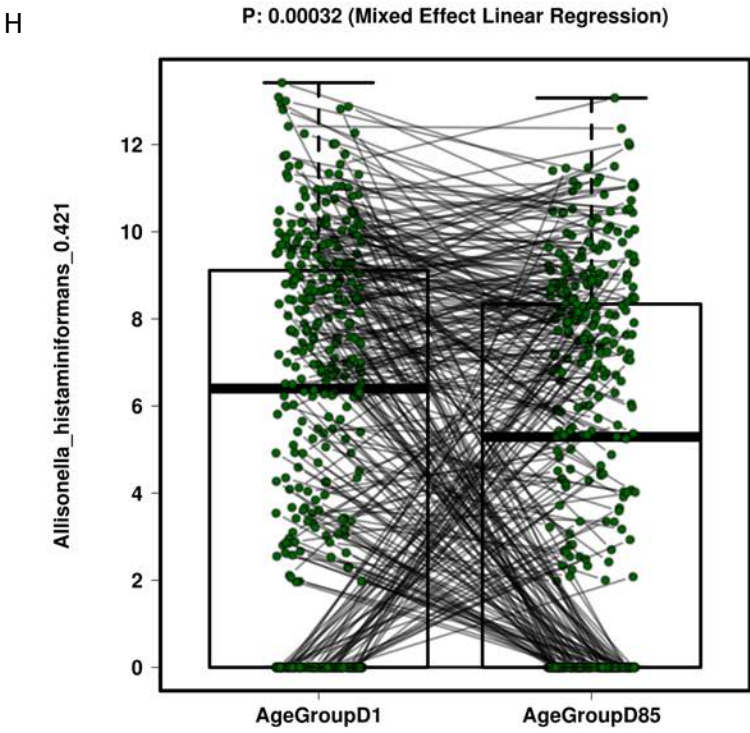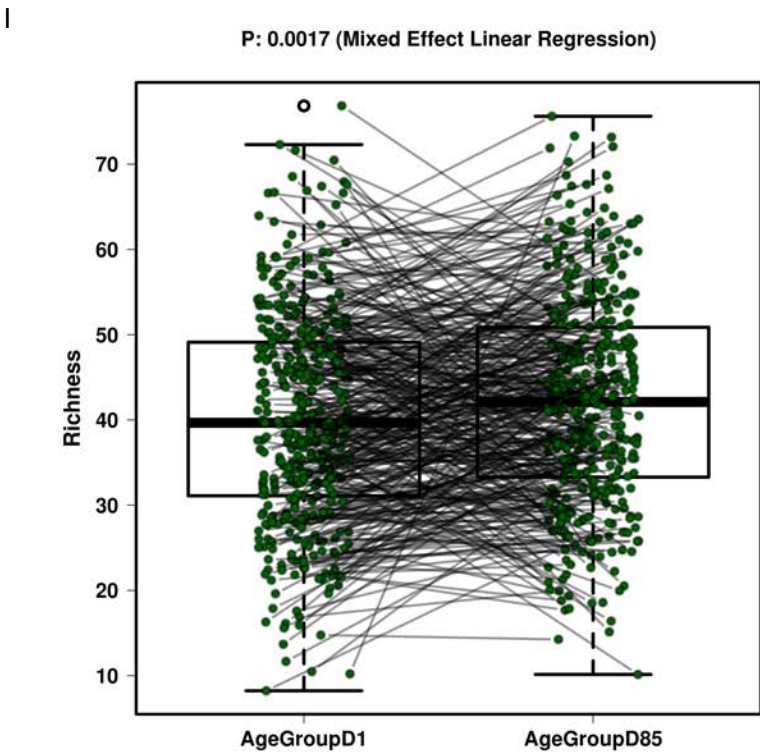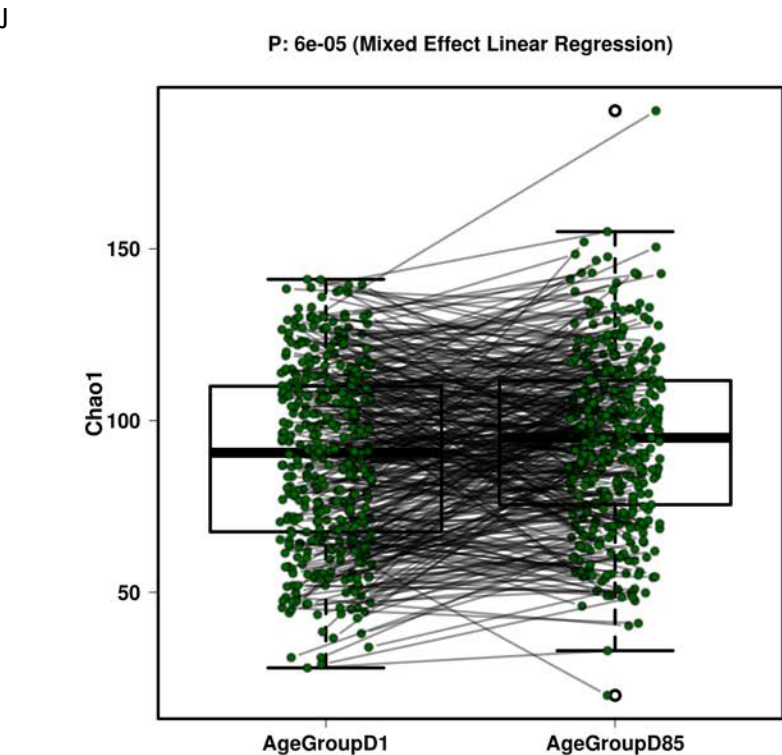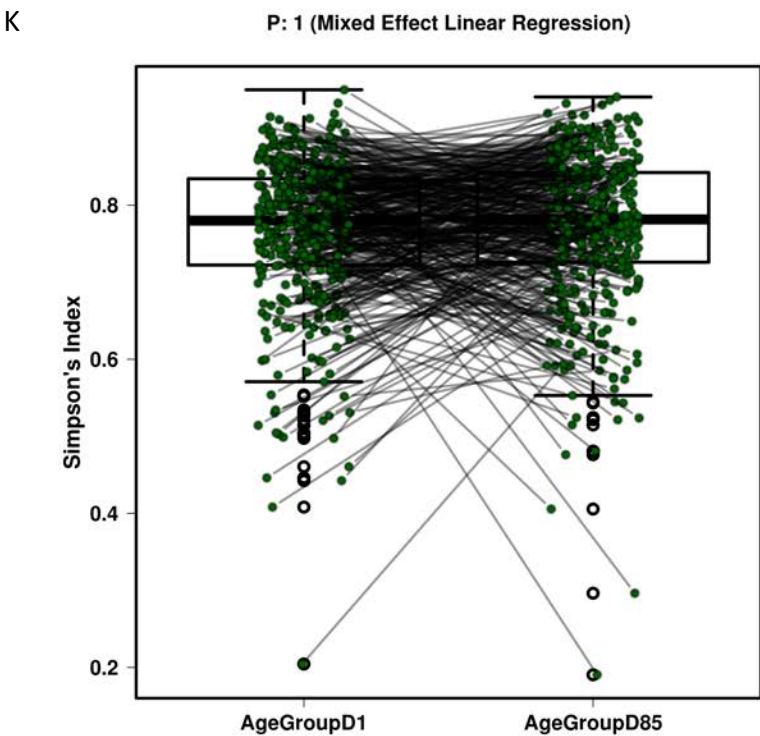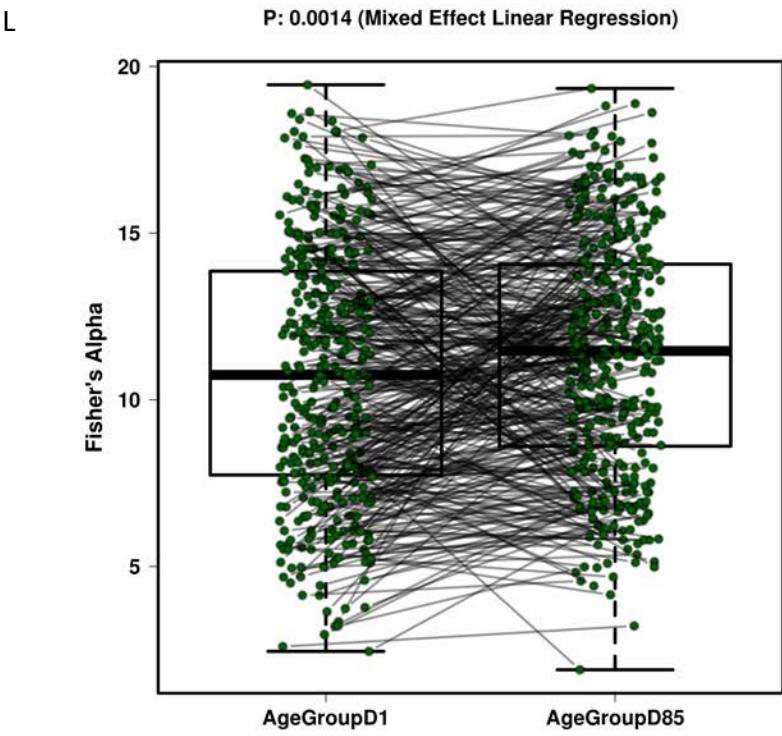

Supplement: Supplementary file 1 [file 0cb223ae88d523aad62b0fa4.pdf]
