# Supplementary material for: The gut microbiome of 7-37 month old children from The Gambia shows the development of a distinct non-industrial Prevotella-based trophic network
Source: Research Square preprint supplement (doi:10.21203/rs.3.rs-220931/v1), 2021-03-02
Supplement: Supplementary file 1 [file 3598f96bfe7eba2c38d92c62.docx]

1. **Study design, children cohort, recruitment, sampling framework and sample characteristics**
2. **DNA extraction**
3. **Bacterial 16S rRNA gene library preparation and Illumina MiSeq sequencing**
4. **Bioinformatics and Statistic**
   1. Bacterial 16S rRNA marker gene analysis

4.2 Oligotyping and species identification

4.3 Alpha diversity analysis

4.4 Beta diversity analysis

4.5 Principal Coordinate Analysis

4.6 Data plotting

4.7 Statistical analysis

4.8 Antibiotic information

**5) Bacterial tropic network analysis**

5.1 Bacterial tropic network using heatmap presentation

5.2 Bacterial tropic network using Spearman correlation coefficient analysis

**6) Bacterial tropic network species development**

**7) Multivariate linear regression to identify an association between bacterial taxa and anthropometric Z-scores**

**8) References**

1. **Study design, children cohort, recruitment, sampling framework and sample characteristics**

The stool samples used in this study were taken from the IHAT-GUT “The **I**ron **H**ydroxide **A**dipate **T**artrate” trial (NCT02941081) which is a three-arm, parallel, randomized, placebo-controlled, double-blind study with iron supplementation in young children with mild to moderate iron deficient anaemia 1,2. The study population in IHAT-GUT were children under the age of 3 years living in the north bank rural communities in the Upper River Region (URR) of The Gambia in West Africa. The study area included 45 villages in the Wuli and Sandu districts, situated approximately 400 km east of the capital Banjul, on the north bank of the river Gambia. All villages had access to borehole tap water at central places and are typical of rural sub-Saharan Africa. A detailed description of the study design, children cohort, recruitment, screening, intervention and ethnic statement are present in Gates open research 1. Stool samples were collected at baseline (Day1), at day 15 and at day 85. Stool samples collected in the OMNIgene® GUT tube contain a DNA stabilizing agent that ensures that samples can be kept at ambient temperature for 60 days. Total stool DNA is extracted from these samples using the Mo Bio PowerLyzer® PowerSoil® DNA Isolation Kit (Qiagen) within 6 weeks of sample collection.

The trial was conducted in accordance with the ethical principles that have their origin in the Declaration of Helsinki, and that are consistent with the International Conference on Harmonisation (ICH) requirements for Good Clinical Practice (GCP), and the applicable regulatory requirements. The study sponsor was the London School of Hygiene and Tropical Medicine (LSHTM) and the study was conducted at the Medical Research Council (MRC) Unit

The Gambia at LSHTM (MRCG). The study protocol and any subsequent amendments have 1

been reviewed and approved by The Gambia Government/MRC Joint Ethics Committee (reference SCC1489). Clinical Trials Authorisation was granted by the Medicines Control Agency, The Gambia (HP373/347/16/MJK(80)). The trial was funded by The Bill and Melinda Gates Foundation (OPP1140952), the funder had no input into the study design or decision to publish. Informed consent for a child to participate in the study was provided by their parent before enrolment in the study.

**Sampling framework and sample characteristics**

We performed 16S rDNA amplification and sequencing on a total of 1546 samples (1466 stool samples, 46 negative and 34 positive controls). In total, we generated 146,603,504 bacterialV1-V2 16S rRNA gene reads. Fifty-six stool samples had less than 1000 high quality reads and were removed from further analysis; this was mainly due to watery samples containing very low biomass which did not provide sufficient DNA for amplification. Of the remaining 1410 samples, 1372 samples were sub-sampled to 20,000 high quality reads per sample and for 38 samples (with 1000-20,000 sequence reads) all reads were kept. Of the 1410 samples left after quality filtering three more samples were removed by the Oligotyping filtering step leaving 1407 samples from 616 patients for detailed analysis. The samples were collected at three different timepoints during an iron intervention trial in The Gambia 3 were available for detailed developmental and bacterial trophic network analysis.

1. **DNA extraction**

Extraction of total genomic DNA was conducted on stool samples collected on visit Days 1, 15 and 85, using the MO BIO Laboratories (now Qiagen) DNeasy PowerLyzer® PowerSoil® Kit (cat. 12855-100). Each extraction was done with 24 samples (23 study samples and one reagent blank). About 250μl of the OMNIGENE (OMNIgene•GUT | OM-200 (DNA Genotek)) sample mix (from a total of 2 mL sample + stabilising liquid mix) was aliquoted into a labelled PowerLyzer® Glass Bead Tube, 0.1 mm (13118-100-GBT) and then gently mixed with 750μl of PowerSoil® Bead Solution (12855-100-BS). About 60μl of solution C1 (12888-100-1) was then added and vortexed briefly. The samples were then homogenised for 45 seconds at 3000 RPM using a Mo Bio PowerLyzer24 bead beater (cat. 13155). About 400-500μl of supernatant was transferred to a clean 2 ml Collection Tube (12888-100-T) following centrifugation of the bead tubes at 10,000 x g for 30 seconds at room temperature. The supernatant was then subjected to several purification steps. To precipitate any non-DNA material, 250μl of solution C2 (12888-100-2) was added, the supernatant vortexed and then Incubated at 4 °C for 5 minutes. The samples were centrifuged at room temperature for 1 minute at 10,000 x g and up to 600μl of supernatant was then transferred into another clean 2 ml collection tube. About 200μl of solution C3 (12888-100-3) was then added and the sample vortexed briefly and incubated at 4 °C for 5 minutes. About 750μl of supernatant was then collected into a clean 2 ml collection tube following centrifugation of sample + solution C3 mix at room temperature for 1 minute at 10,000 x g. This was followed by the addition of 1200μl of Solution C4 (12888-100-4) to the supernatant which was then vortexed for 5 seconds. Using PowerSoil® Spin Filters units in 2 ml tubes (12888-100-SF)), 675μl of supernatant was loaded and filtered at 10,000 x g for 1 minute at room temperature. The flow through was discarded and the step repeated two more times. About 500μl of ethanol-based Solution C5 (12888-100-5) was aliquoted into the spin filter and centrifuged at room temperature for 30 seconds at 10,000 x g and the flow through discarded. To remove any residual solution C5, the spin filter was again centrifuged at room temperature for 1 minute at 10,000 x g. The spin filter was then carefully transferred into a clean 2 ml collection tube while avoiding the splashing of solution C5 onto the Spin Filter. Finally, about 110μl of Solution C6 is added to the centre of the white filter membrane before centrifugation at room temperature for 30 seconds at 10,000 x g. The spin filter is then discarded and the DNA solution aliquoted into two clean 2 ml collection tube and stored at -80 °C for downstream processing. The DNA concentration was occasionally measured on random samples to assess sample concentration and purity using the NanoDrop® ND-1000 UV-Vis Spectrophotometer.

1. **Bacterial 16S rRNA gene library preparation and Illumina MiSeq sequencing**

The bacterial 16S rRNA V1V2 variable region of extracted DNA was amplified with Illumina adapter and indexed PCR primers using a dual-index sequencing strategy to target the bacterial 16S rRNA gene 4. Each PCR was done in triplicate in a total reaction volume of 25 μl together with 200μM deoxynucleotide triphosphates (dNTPs), 0.5μM V1 forward primers (7f 5' AATGATACGGCGACCACCGAGATCTACAC-XXXXXXXX-acactctttccctacacgacgctcttccgatct-NNNN-AGMGTTYGATYMTGGCTCAG3'), 0.5μM V2 reverse primer (r356 5' –CAAGCAGAAGACGGCATACGAGAT-XXXXXXXX-gtgactggagttcagacgtgtgctcttccgatct-NNNN-GCTGCCTCCCGTAGGAGT- 3'), and 0.25μl Q5 Taq enzyme. The Illumina adapter primer sequence is built of <Illumina adapter> < 8 bp index sequences> <binding side for Illumina sequencing primer> <4 maximally degenerated bases> ("NNNN") to maximize diversity during the first four bases of the run and <PCR target sequence>. Cycling conditions were as follows: Denaturation at 98°C for 2 minutes, followed by 30 cycles of amplification (denaturation 98°C for 30 seconds, annealing 50°C for 30 seconds, extension 72°C for 90 seconds) and a final extension at 72°C for 5 minutes. All primers were purchased from Metabion International AL AG. Triplicate PCR reactions were pooled and purified with 75μl

Agencourt AMPure XP, 60 mL (A63881)according to Illumina's 16S metagenomic sequencing library preparation protocol, (support.illumina.com, n.d.)pages 8-9 (Part # 15044223 Rev. B,1127/2013 (2). DNA concentration were quantified using the Invitrogen™ Qubit™ 3.0 Fluorometer (Invitrogen™ Q33216) and Qubit™ dsDNA HS Assay Kit (Q32854). Samples were pooled in equimolar concentration and gel purified using The Wizard® SV Gel and PCR Clean-Up System (Promega). The library size was confirmed on a QIAxcel Advanced - QIAGEN and then MiSeq sequenced using the 600 cycle MiSeq reagent kit V3, which enables 300 base pair end sequencing. The library was sequenced at the Wellcome Sanger Institute (Cambridge, United Kingdom). A total of 1546 samples including negative (n=45) and (n=34) positive controls were sequenced in 18 MiSeq libraries.

1. **Bioinformatics and Statistic**

4.1 Bacterial 16S rRNA maker gene analysis

The forward and reverse fastq files of each sample were processed according to the MOTHUR MiSeq SOP with some modifications (MOTHUR wiki at <http://www.mothur.org/wiki/MiSeq_SOP>). The "make.contigs" command was used with no extra parameters. The assembled contigs were taken out from the MOTHUR pipeline and the four poly NNNNs present in the adapter/primer sequences were removed using the "-trim_left 4" and "-trim_right 4" parameters in the PRINSEQ program 6. The PRINSEQ trimmed sequences were used for the first "screen.seqs" command to remove ambiguous sequences (maxambig=0) and sequences containing homopolymers longer than 8 bp (maxhomop=8). The quality-screened sequences were aligned using the Silva bacterial database "silva.nr_v123.align" with flip parameter set to true. Any sequences outside the expected alignment coordinates were further removed using the "screen.seqs" command. The alignment coordinates were set with "optimize=start-end, criteria=90". In addition, any sequences longer than 400 bp were remove with "maxlength=400". The correct aligned sequences were filtered using the "filter.seqs" command with "vertical=T" and "trump=.". The subsequent filtered sequences were de-noised by allowing three mismatches in the "pre.clustering" step and chimeras were removed using Uchime with the dereplicate option set to "true". The chimera free sequences were classified using the Silva reference database "silva.nr_v123.align" and the Silva taxonomy database "silva.nr_v123.tax" and a cut off value of 80%. Chloroplast, Mitochondria, unknown, Archaea, and Eukaryota sequences were removed. The high quality, chimera free, and correct classified sequences were normalized using the "sub.sample" command. Each sample was normalized to 20,000 reads. This removed 94 patient samples with reads below 20,000 per sample from a total of 1546 samples. 38 out of the 94 samples with reads between 1000 and 20,000 per samples were added back to the dataset. One mislabelled sample (negative control outlier) was also removed from the dataset, leaving 1489 samples available for Oligotyping.

4.2 Oligotyping and species identification

Oligotyping was used for clustering the high quality filtered fasta sequences from the MOTHUR pipeline. Oligotyping is a computational method to investigate the diversity of closely related by distinct bacterial organisms in final operational taxonomic units identified in environmental data sets through 16S ribosomal RNA gene data by the canonical approaches. For Oligotyping we used the “Minimum Entropy Decomposition” (MED) option for sensitive partitioning of high-throughput marker gene sequences from the Oligotyping pipeline 7. The normalized high quality fasta and name file from MOTHUR were renamed by appending the group name to the sequence name, using the "rename.seqs" command. Then, a redundant renamed-fasta file was generated using the "deunique.seqs" command, which creates a redundant fasta file from a fasta and name file. The redundant fasta file was subsequently used for Oligotyping using the unsupervised "Minimum Entropy Decomposition" (MED). The command line was "decompose <fasta.file> –g –t - -M 100 -V 2" The –t character which was set to a dash "-" character. The dash character was used in MOTHUR "rename.seqs" command to separate the sample name from the unique info in the defline of the sequence name. The -M integer defines the minimum substantive abundance of an oligotype and the -V integer defines the maximum variation allowed in each node. This MED settings generated 10152 oligotypes (OTPs). The node representative sequence of each OTP was used for species profiling using the ARB analysis - A Software Environment for Sequence Data (version 5.5-org-9167) 8. For ARB analysis we used a customized version of the SILVA SSU Ref database (NR99, release 123) that was generated by removing environmental and uncultured taxa.

The ARB generated short species abbreviations were then correlated with the full taxonomic path from species to phyla. The 10152 redundant ARB species were then consolidated to non-redundant 524 species which were present in the 1407 patient samples with a minimum substance abundance of an oligotype per node of 100 (-M setting from above). The consolidation was performed using the “Consolidate” option in EXCEL (Microsoft Excel for Mac version 16.16.14). The 524 species were further consolidated to 216 genera and 71 bacterial families.

4.3 Alpha diversity

Alpha diversity indexes for Fisher’s alpha parameter, Simpson’s index, Chao1 richness index, and richness index (observed richness) were calculated using the online web portal Calypso version: 8.84 9. The **Fisher's alpha parameter** was first descripted as a logarithmic series model in 1943 10 and attempt to describe mathematically the relationship between the number of species and the number of individuals in those species. The Fisher’s alpha parameter description was adapted from the University of Camerion, Italy, School of Biosciences and Veterinary at URL <http://groundvegetationdb-web.com/ground_veg/home/diversity_index> (accessed 24th and 25th Oct 2019). The Fisher’s alpha parameter was originally used as an appropriate fit to empirical data, its wide application, especially in entomological research, has led to a thorough examination of its properties 11. The small number of abundant species and the large proportion of 'rare' species (the class containing one individual is always the largest) predicted by the log series model suggest that, like the geometric series, it will be most applicable in situations where one or a few factors dominate the ecology of a community. Thus, we consider the Fisher’s alpha parameter as a perfect additional alpha diversity index to the Shannon index for any bacterial 16S datasets which are always dominated by few dominant species and many dominant species. The alpha diversity graph and statistical analysis using non-parametric Kruskall-Wallis test was done in GraphPad Prism 7 for Windows.

4.4 Beta diversity analysis

Multivariate beta diversity analysis was performed using PERmutational Multivariate ANalysis Of VAriance (PERMANOVA) using in the PAST3 statistical software package, version 3.20 12, with 999 permutations. To compare sub-variables within the three age groups (young, middle, and old) we used the pairwise PERMANOVA test in the PAST3 statistical software package. The similarity index was set to Bray-Curtis and for the Permutation N: we used the default of 9999. For the pairwise PERMANOVA test we reported the Bonferroni adjusted P value and the F statistic value.

4.5 Principal Coordinate Analysis

For the visualization of microbial compositional differences between environmental variables (age group, timepoint, treatment, season and geographic location) we plotted the microbial variances using a multivariate method called Principal Coordinate Analysis (PCoA) for taxon level “Species”. For the visualization of microbial differences between the three young, middle, and old age groups, we analyzed the datasets at the Species, Genus, and Family level using PCoA. The PCoA analysis was done using the online web portal Calypso version: 8.84 9. The PCoA was done on the Bray-Curtis matrix (default settings in Calypso). For PCoA the absolute abundances were transformed to relative abundance using total sum scaling (TSS). Then the TSS dataset was normalised using cumulative-sum scaling (CSS), a widely used method for normalizing microbial community compositional data. CSS correct for biases introduced by TSS 13. The CSS selection automatically performs a log2 transformation to account for the non-normal distribution of taxonomic counts data.

4.6 Data plotting

Data were plotted in GraphPad Prism 7.00 for Windows or using Mac Numbers (v 6.2.1).

Figures were compiled in Mac Keynote (v 9.2.1). The top 22 Species, top 26 Genus, and top 18 Families with a minimum abundance of 0.5% across all samples were plotted for the young, middle and old age groups next to the corresponding PCoA plot in **Figure 2.**

We also plotted the top 10 species with a minimum abundance of 1% across all samples which were significantly associated with age in the three-age group analysis (young, middle, and old) and in the 11-age group analysis separated by three months interval (**Figure 3**). The P value shown in **Figure 3** were obtained from the non-parametric Kruskal-Wallis rank test.

4.7 Statistical analysis

Statistical analysis was either performed in R, PAST4 or in Calypso Web portal for the ANCOM test and ALDEx2 test. The non-parametric Kruskal-Wallis rank sum test was used to identify significantly differentially abundant bacterial taxon in the 11 three-months age groups. The P value was corrected using the False Discovery Rate method. The Permanova Test was conducted in PAST4 12 and the ANCOM and ALDEx2 test in Calypso version 8.84 9.

The Analysis of Composition of Microbiomes (ANCOM) is a novel method for the analysis of composition of microbiomes that accounts for compositional constraints to reduce false discoveries in detecting differentially abundant taxa at an ecosystem level, while maintaining high statistical power 14. ANCOM accounts for the underlying structure in the data and can be used for comparing the composition of microbiomes in two or more populations. ANCOM makes no distributional assumptions and can be implemented in a linear model framework to adjust for covariates as well as model longitudinal data. ANCOM also scales well to compare samples involving thousands of taxa.

ALDEx2 is an ANOVA like differential expression tool for high throughput sequencing data. Fundamentally, ALDEx2models the data as the *probability* of observing the count 15. The ALDEx2 reports the:

kw.ep a vector containing the expected p-value of the Kruskal-Wallis test for each species.

kw.eBH a vector containing the corresponding expected value of the Benjamini-Hochberg corrected Kruskal-Wallis p-value for each species.

glm.ep a vector containing the expected p-value of the glm ANOVA for each species.

glm.eBH a vector containing the corresponding expected value of the Benjamini-Hochberg corrected ANOVA p-value for each species.

The aldex.glm calculate the generalized linear model (GLM) statistics using a “model.matrix”. It is a flexible generalization of ordinary linear regression that allows for response variables that have error distribution models other than a normal distribution.

4.8 Antibiotic information

In this large study only 15/633 patients (2.4%) had received antibiotics within the collection time frame. They were treated for dysentery (N = 12 patients) and respiratory infections (N = 3 patients). All except two of these patients had received their antibiotics after the day 15 stool collection (min 23 days, max 65 days, mean 41 days, SD 15 days). Two patients received antibiotics at day 8 and 14. One patient received two courses of antibiotics; one starting at day 27 and the second one at day 45. In the middle age group 8/193 patients received antibiotics (one patient received antibiotics twice), in the old age group 6/247 patients received antibiotics, and in the young age group 1/32 patients received antibiotics. We performed multivariate PCoA analysis for the middle age group (12 - <24 mths) (**Supplementary Figure 1.a**) and old age group (24 – 40 mths) (**Supplementary Figure 1.b**) patients comparing the microbiome from the antibiotic treatment samples with the non-antibiotic samples from the day 85 collection time points. PCoA analysis revealed that all antibiotic treatment samples clustered within the expected range of the other samples and did not present as outliers. ANCOM testing 14 revealed no significant differences in microbial composition between antibiotic positive and negative samples in the middle age group (data not shown). In the old age group, only one species was statistically significantly depleted in the antibiotic treated group. *Holdemanella biformis*, with an overall abundance of 0.416 % in all 1407 samples, were detected at a mean abundance of 0.069 in the antibiotic positive group and at a mean abundance of 0.65 in the antibiotic negative group, **Supplementary Figure 1.c** (ANOVA uncorrected P value 7.5e-06). As antibiotic use had not caused obvious microbiome composition distortions the analysis was continued with all samples included. The limited or absent effect of antibiotics was most likely due to the large time frame (min 23 days, max 65 days, mean 41 days) between antibiotics being given and the day 85 stool collection.

**5) Bacterial tropic network analysis**

5.1 Heatmap to visualize bacterial tropic networks

The heatmap (**Figure 4.a**) used to visualize bacterial trophic networks was generated using the online web portal Calypso version: 8.84 9 using TSS normalized abundances. For easier visualization we used the top 51 species with a minimum abundance of 0.2% in all samples. Blocks representing apparent trophic networks or other kinds of associations were color coded on the heatmap. The *Prevotella stercorea* network cluster is highlighted in green, the *Faecalibacterium prausnitzii* network cluster is highlighted in light blue, the small intestine microbiota cluster is highlighted in dark blue, and the *Bifidobacterium* cluster (young age) is highlighted in black. Several additional important bacteria are highlighted in red colours including, *Prevotella copri*, *Bacteroides*, and *Escherichia coli*. Emphasis on their associations with each other is given with black lines. Please note: a read heatmap colour means strong positive correlation and a blue heatmap colour means strong negative correlation. There are additional species correlated outside the obvious labelled clusters, which were not labelled.

5.2 Bacterial tropic network summary
The bacterial tropic network summary was generated from Spearman correlation coefficient data.

**6) Bacterial tropic network species development**

Species identified to be either associated with the *Prevotella stercorea* or the *Faecalibacterium prausnitzii* cluster (see Heatmap) were plotted as a stacked line chart using Mac Keynote version 10.0. For this analysis we used the TSS normalized and CSS+log2 transformed dataset using the online web portal Calypso version: 8.84 9. The values for the individual taxa were taken from Supplementary Table 2.

**7) Multivariate linear regression to identify an association between bacterial taxa and anthropometric Z-scores**

Multivariate linear regression (MLR) is a powerful technique that can identify complex association between bacterial taxa composition and multiple explanatory variables. In this analysis the multiple explanatory variables were height-for-age *Z*-scores (HAZ), weight-for-age *Z*-scores (WAZ), weight-for-height *Z*-scores (WHZ). In a first analysis we used MLR to identify an association between individual bacterial taxa and all Z-scores factors controlled by age and in a second analysis we used MLR to identify an association between bacterial community diversity (alpha diversity indexes) and all Z-scores factors again controlled by age. MLR was conducted using the advanced regression analysis option in the online CALPYSO web portal (version 8.84) 9.

**References**

1. Pereira, D. I. A. *et al.* A novel nano-iron supplement to safely combat iron deficiency and anaemia in young children: The IHAT-GUT double-blind, randomised, placebo-controlled trial protocol. *Gates Open Res.* **2**, 48 (2018).

2. WHO. Guideline daily iron supplementation in infants and children. in *Daily Iron Supplimentation in infants and children* (2016).

3. Pereira, D. I. A. *et al.* A novel nano-iron supplement to safely combat iron deficiency and anaemia in young children: The IHAT-GUT double-blind, randomised, placebo-controlled trial protocol. *Gates Open Res.* (2018). doi:10.12688/gatesopenres.12866.2

4. Kozich, J. J., Westcott, S. L., Baxter, N. T., Highlander, S. K. & Schloss, P. D. Development of a dual-index sequencing strategy and curation pipeline for analyzing amplicon sequence data on the MiSeq Illumina sequencing platform. *Appl. Environ. Microbiol.* **79**, 5112–20 (2013).

5. Illumina. 16S Metagenomic Sequencing Library Preparation. Available at: https://support.illumina.com/documents/documentation/chemistry_documentation/16s/16s-metagenomic-library-prep-guide-15044223-b.pdf. (Accessed: 15th August 2018)

6. Schmieder, R. & Edwards, R. Quality control and preprocessing of metagenomic datasets. *Bioinformatics* **27**, 863–864 (2011).

7. A Murat Eren, Hilary G Morrison, Pamela J Lescault, Julie Reveillaud, J. H. V. and M. L. S. Minimum entropy decomposition: Unsupervised oligotyping for sensitive partitioning of high-throughput marker gene sequences. *ISME J.* **9**, 968–979 (2015).

8. Ludwig, W. ARB: a software environment for sequence data. *Nucleic Acids Res.* **32**, 1363–1371 (2004).

9. Zakrzewski, M. *et al.* Calypso: a user-friendly web-server for mining and visualizing microbiome–environment interactions. *Bioinformatics* **33**, 782–783 (2017).

10. Fisher, R. A., Corbet, A. S. & Williams, C. B. The Relation Between the Number of Species and the Number of Individuals in a Random Sample of an Animal Population. *J. Anim. Ecol.* **12**, 42 (1943).

11. TAYLOR, L. R. *Diversity of insect faunas (Symposia of the Royal Entomological Society of London)*. (Balckwell, Oxford, Royal Entomological Society, 1978, 1978).

12. Hammer, Ø., Harper, D. A. T. & Ryan, P. D. PAST: Paleontological statistics sofware package for education and data analysis. *Palaeontol. Electron.* **4**, 1–9 (2001).

13. Paulson, J. N., Talukder, H., Pop, M. & Bravo, H. C. Robust methods for differential abundance analysis in marker gene surveys. *Nat. Methods* **10**, 1200–1202 (2013).

14. Mandal, S. *et al.* Analysis of composition of microbiomes: a novel method for studying microbial composition. *Microb. Ecol. Heal. Dis.* **26**, 27663 (2015).

15. Fernandes, A. D. *et al.* Unifying the analysis of high-throughput sequencing datasets: characterizing RNA-seq, 16S rRNA gene sequencing and selective growth experiments by compositional data analysis. *Microbiome* **2**, 15 (2014).
